# Supplementary material for: Targeted treatment of gouty arthritis by biomineralized metallic nanozyme-mediated oxidative stress-mitigating nanotherapy
Source: Royal Society of Chemistry journal article supplement (doi:10.1039/d3tb00669g), 2023-01-01
Supplement: d3tb00669g1.pdf [file d3tb00669g1.pdf]

## Supporting Information

### **Targeted treatment of gouty arthritis by biomineralized metallic nanozymes mediated oxidative stress mitigating nanotherapy**

Adityanarayan Mohapatra<sup>a</sup>, Ayeskanta Mohanty<sup>a</sup>, Padmanaban Sathiyamoorthy<sup>a</sup>, Sahil Chahal<sup>a</sup>, Veena Vijayan<sup>a</sup>, Santhosh Kalash Rajendrakumar<sup>b</sup>, and In-Kyu Park<sup>a\*</sup>

<sup>a</sup>Department of Biomedical Science, BK21 PLUS Center for Creative Biomedical Scientists, Chonnam National University Medical School, Gwangju 61469, South Korea.

<sup>b</sup>Department of Chemistry, University of Warwick, Coventry CV4 7AL, United Kingdom.

\*Corresponding author's email addresses: [pik96@jnu.ac.kr](mailto:pik96@jnu.ac.kr)

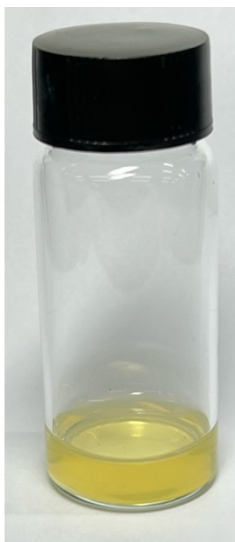

CNZs

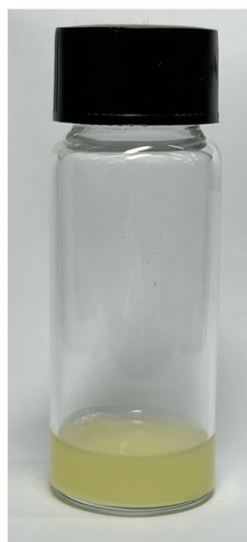

FALNZs

Figure S1- Photograph of CNZs and FALNZs formulation.

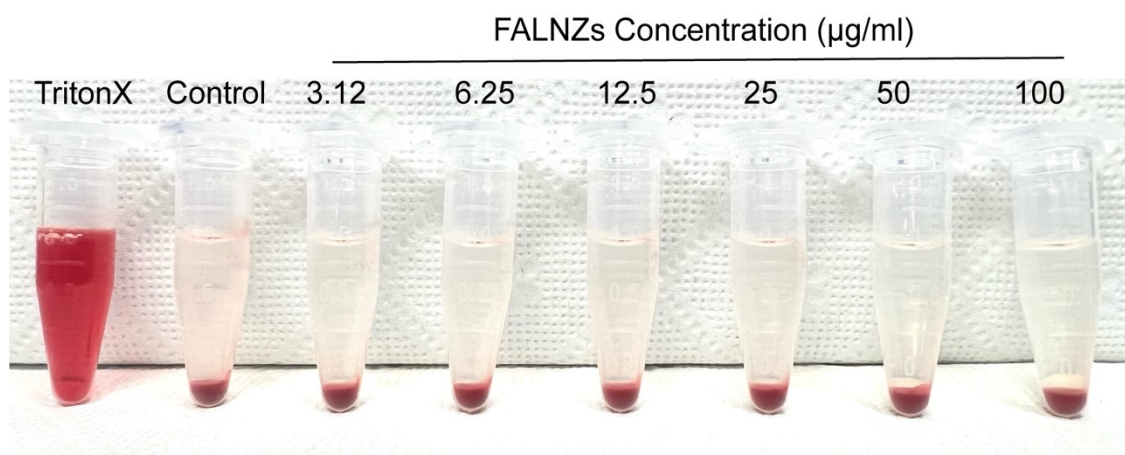

Figure S2- Representative image of hemolysis assay.

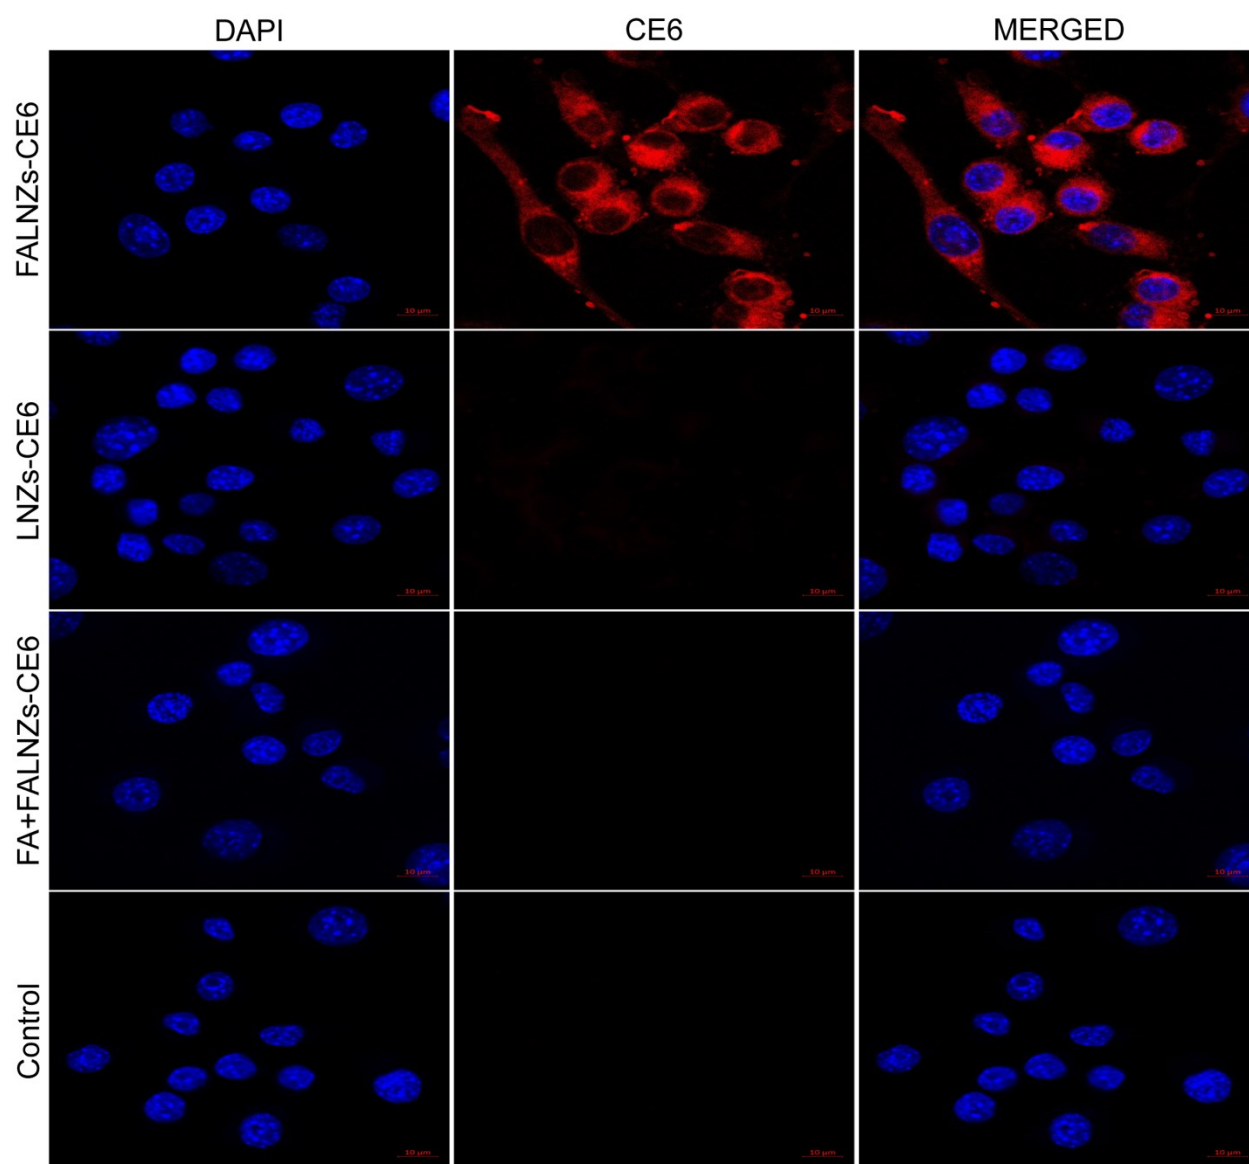

Figure S3- Intracellular uptake of FALNZs in RAW 264.7 cells.

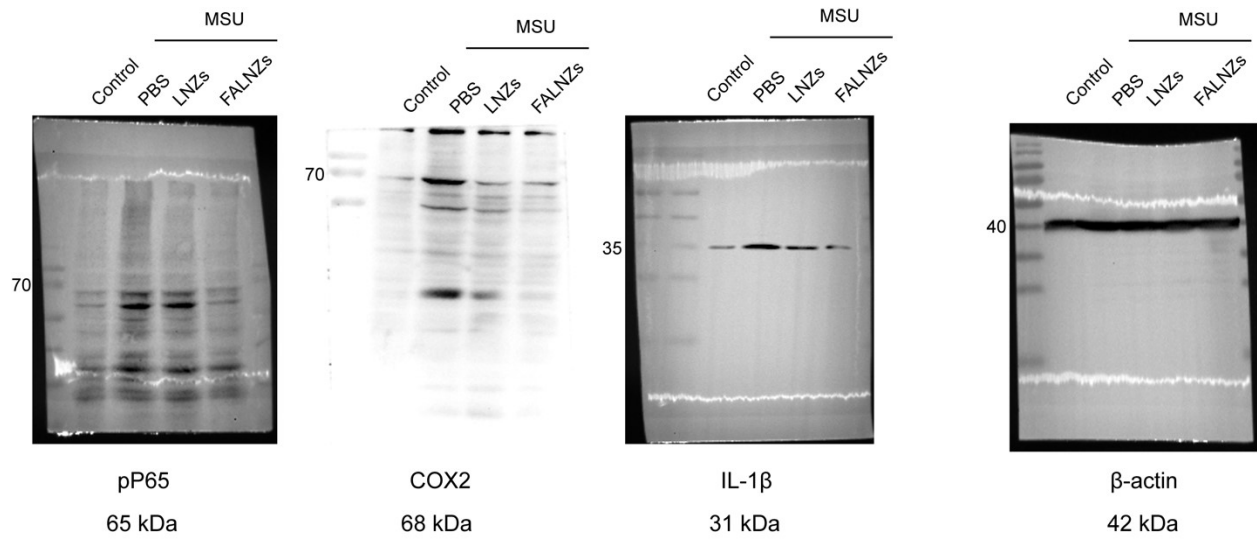

Figure S4- Western blot analysis of inflammatory proteins in RAW 264.7 cells.

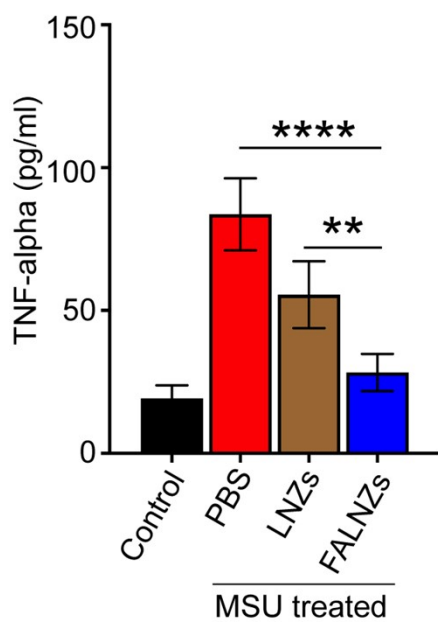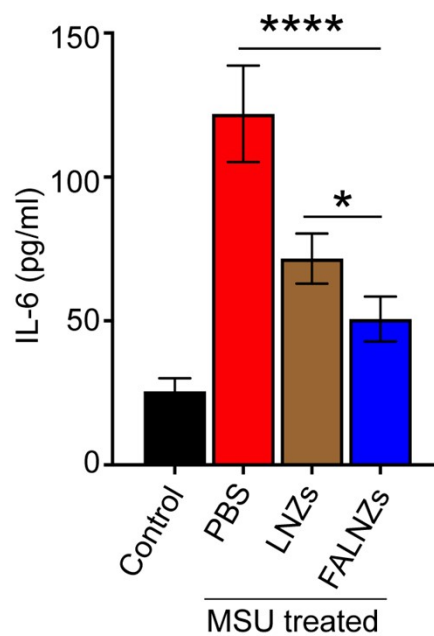

Figure S5- Proinflammatory cytokines TNF $\alpha$  and IL-6 from RAW 264.7 cell supernatant through ELISA.

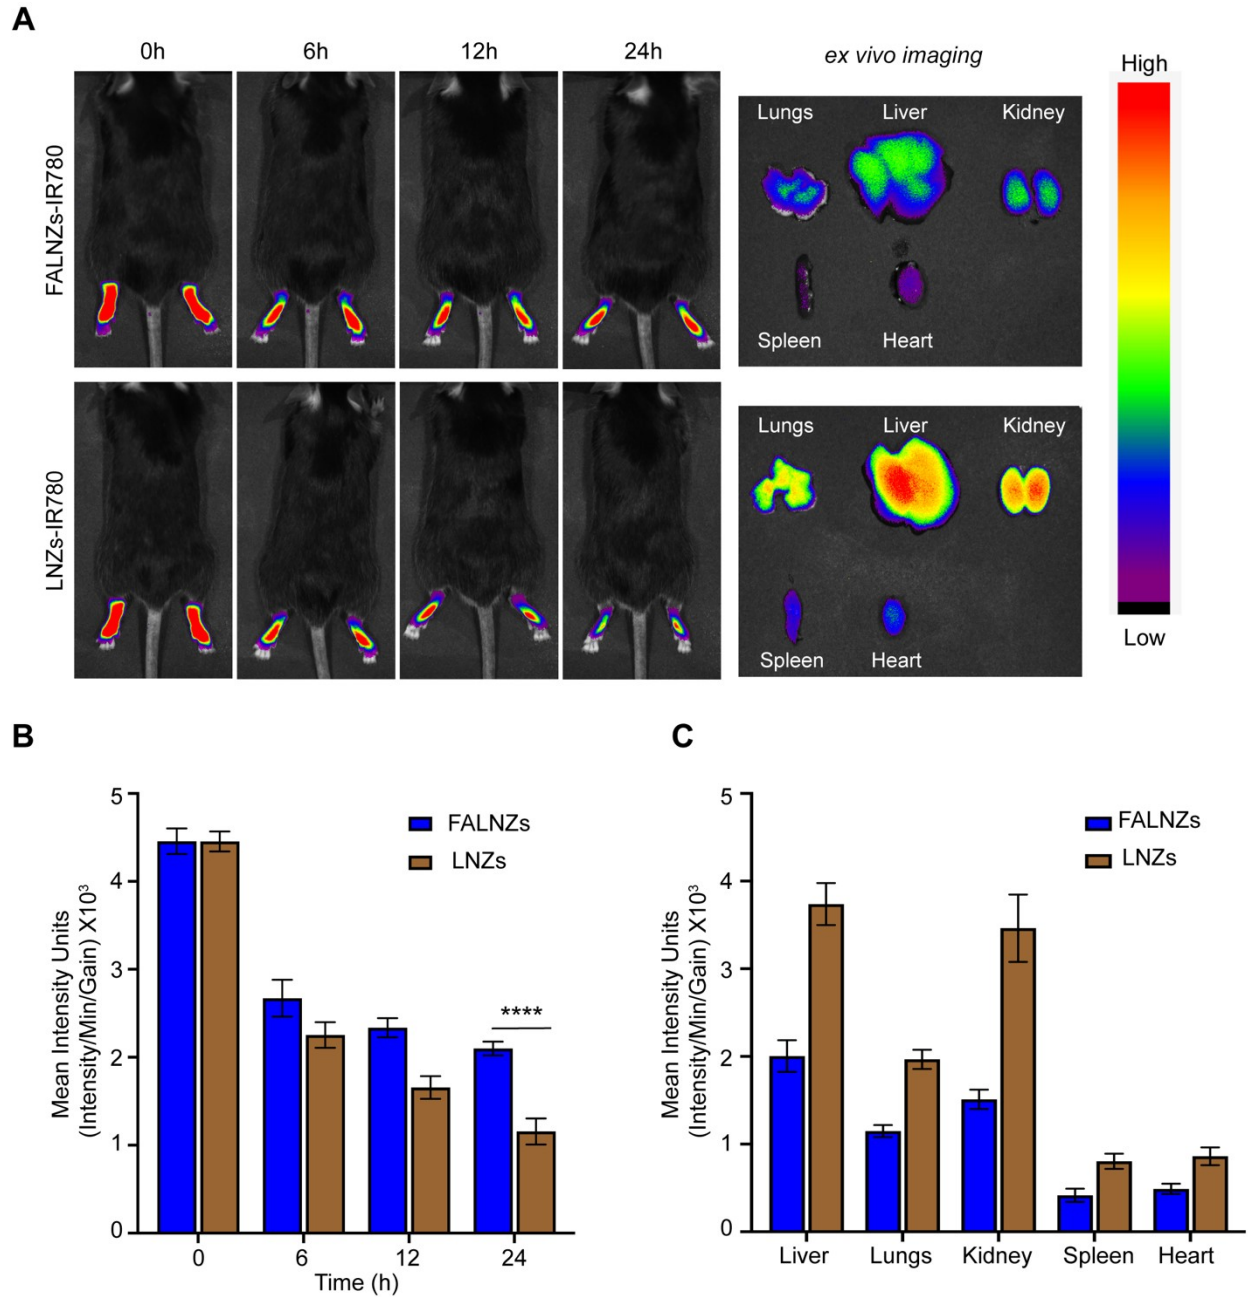

Figure S6-Biodistribution of FALNZs and LNZs in gouty arthritis mice. A) Representative images of FALNZs-IR780 and LNZs-IR780 injected mice and *ex vivo* images of organs. B) Quantitative analysis of fluorescence intensity in ankle. C) Quantitative analysis of fluorescence intensity in major organs.

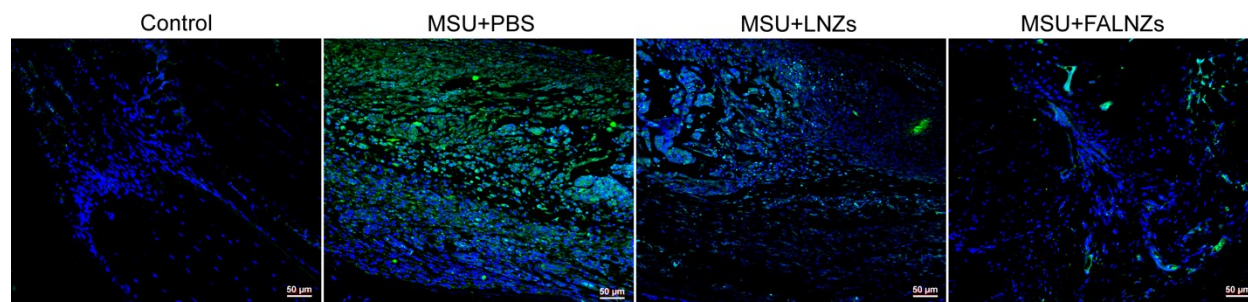

Figure S7- Immunofluorescence staining of M1 Macrophage (CD86) in the ankle tissue.
